# Supplementary material for: Ontogeny and morphometrics of the gill and swim bladder of air-breathing striped catfishPangasianodon hypophthalmus
Source: Oxford University Press journal article supplement (doi:10.1242/jeb.168658), 2017-01-01
Supplement: jeb168658supp.pdf [file jeb168658supp.pdf]

## Supplementary Material

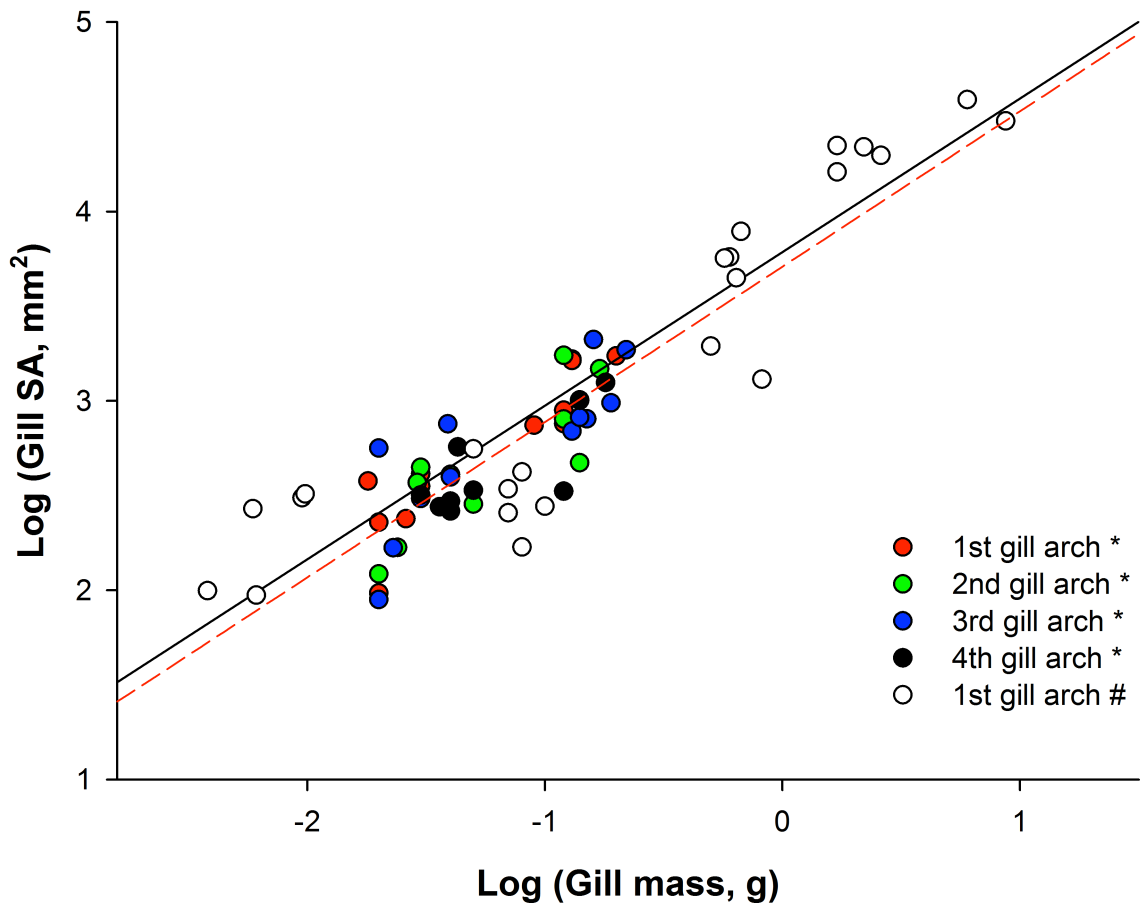

**Fig. S1. Bilogarithmic plots of lamellar SA in relation to gill arch mass of *Pangasianodon hypophthalmus*.** \* indicates data from Phuong et al. (2017) of fish with no ILCM; # indicates potential lamella SA from first gill arch in this study. The equation for the regression line (Black line) for the whole data set is  $Y=0.834X + 3.75$  and  $R^2=0.845$ . For the data from Phuong *et al.*, (2017) the regression line (red dashed line) is given by  $Y=0.820X+3.71$  and  $R^2=0.705$ .
